# Supplementary material for: Function of Metallothionein-3 in Neuronal Cells: Do Metal Ions Alter Expression Levels of MT3?
Source: PubMed Central journal article supplement (PMC5485957; doi:10.3390/ijms18061133), 2017-05-25
Supplement: ijms-18-01133-s001.pdf [file ijms-18-01133-s001.pdf]

## Supplementary Materials: Function of Metallothionein-3 in Neuronal Cells: Do Metal Ions Alter Expression Levels of MT3?

Jamie Bousleiman, Alexa Pinsky, Sohee Ki, Angela Su, Irina Morozova, Sergey Kalachikov, Amen Wiqas, Rae Silver, Mary Sever, and Rachel Narehood Austin

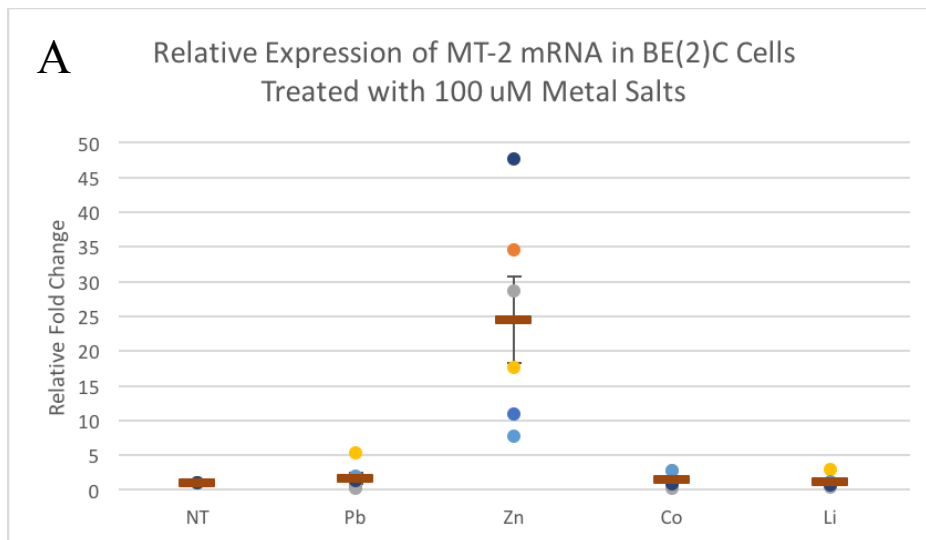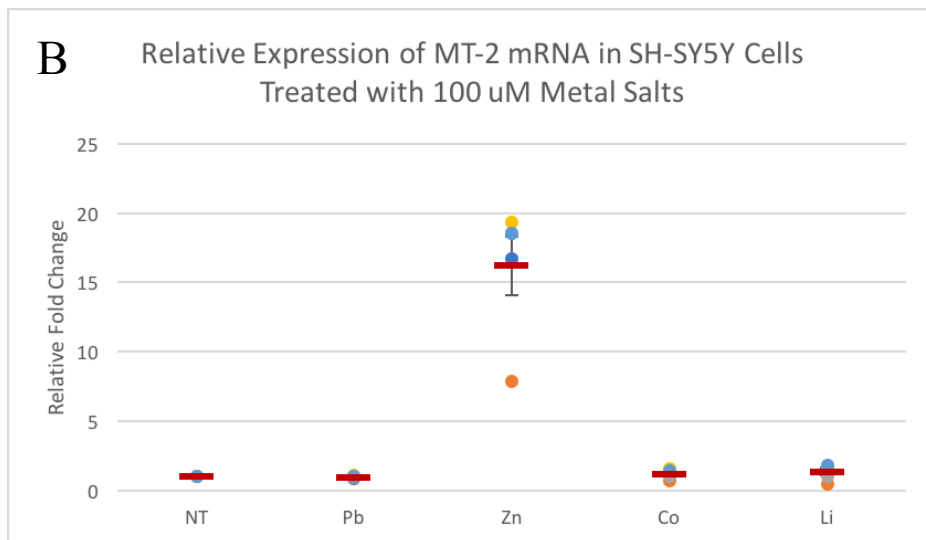

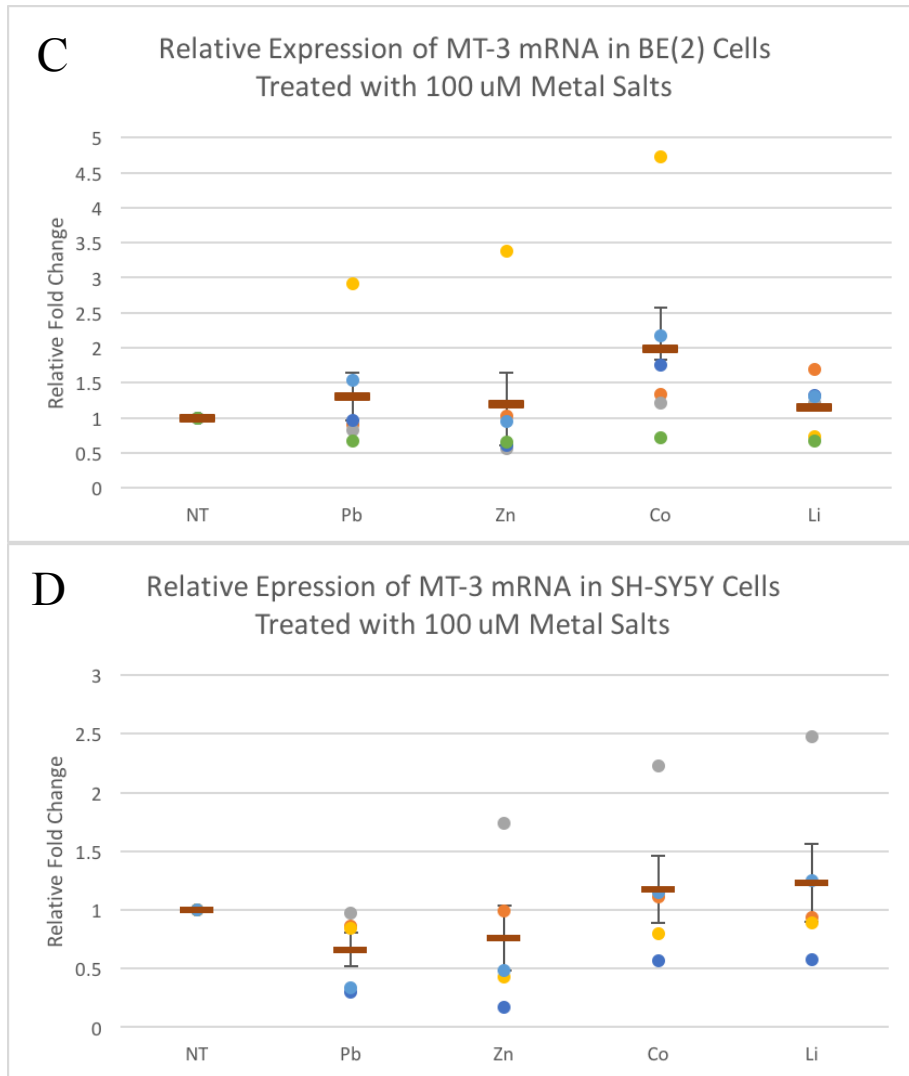

**Figure S1. Relative fold change in cDNA expression after various metal treatments.** NT = no metal treatment. (A) *MT2* from BE(2)C cells; (B) *MT2* from SH-SY5Y cells; (C) *MT3* from BE(2)C cells; (D) *MT2* from SH-SY5Y cells. Average fold change is shown as a horizontal brown line, and standard deviation is shown as a vertical gray line.

**Table S1. Genes for metal-binding and Zn-binding GO categories found among upregulated genes in Group A and Group B.** Enriched terms for *Metal binding*, *Zinc-finger proteins* and *Zinc* were the same for both groups. **Count** is the number of differentially expressed genes matching the term; **%** is the percentage of the genes matching the term with respect to all differentially expressed genes that can be functionally annotated for the given group; **Pval** is a modified *Fisher Exact* test *P*-value for gene-enrichment analysis estimated using EASE.<sup>1</sup> *P*-values smaller than 0.05 indicate a strong enrichment in the functional annotation term.

| Group A              |       |    |          | Group B                                                                                                                                                                                                                                                                                                                                                                                                                                                                                                                                                             |       |    |          |                                                                                                                                                                                                                                                                                                                                                                                                                                                                                                                                                                                                                                                                         |
|----------------------|-------|----|----------|---------------------------------------------------------------------------------------------------------------------------------------------------------------------------------------------------------------------------------------------------------------------------------------------------------------------------------------------------------------------------------------------------------------------------------------------------------------------------------------------------------------------------------------------------------------------|-------|----|----------|-------------------------------------------------------------------------------------------------------------------------------------------------------------------------------------------------------------------------------------------------------------------------------------------------------------------------------------------------------------------------------------------------------------------------------------------------------------------------------------------------------------------------------------------------------------------------------------------------------------------------------------------------------------------------|
| Term                 | Count | %  | PVal     | Genes                                                                                                                                                                                                                                                                                                                                                                                                                                                                                                                                                               | Count | %  | PVal     | Genes                                                                                                                                                                                                                                                                                                                                                                                                                                                                                                                                                                                                                                                                   |
| <b>Metal-binding</b> | 248   | 17 | 1.24E-05 | PNMA3, DZIP1, OVCH2, RP9, ZNRF4, SYT6, RORB, ITSN2, CD209D, BTK, ATP2B1, MAP3K6, MAP3K5, ZFP930, U2AF1, ZRSR1, CDH26, ZFP936, CLCA1, PLD6, RXRG, OLA1, POLB, NUDT10, OGFOD1, PRDM9, PITPNM3, HNF4A, ZGLP1, NEK9, ADAMTS1, UNC13B, FUS, ERMP1, GNAI2, ZCRB1, AKAP13, UBA5, PPAT, PLAGL1, THTPA, MACF1, ZMPSTE24, AEBP2, BMP1, TGFBR1, AGBL4, S100A11, TNNI3, AFG3L1, PPA2, ZFP609, ATP13A4, ZFP940, CBLC, ZFP442, RNF7, HSPB11, RAPSN, COX1, DZIP1L, ZFP947, TRAFD1, ZFP949, PRKRIR, ZMAT1, PPARA, SH3RF1, PXDN, ZFP46, PPARG, GLI3, STAC3, GM14391, NUBP1, GM14393, | 386   | 18 | 2.39E-08 | HCCS, GDA, ITSN1, CIAPIN1, BRPF1, DDAH1, CRYAB, NME6, OGFOD1, PITPNM1, NME3, ZNHIT1, PELO, ZNHIT3, TMEM129, RPS27, CDADC1, ZC3H13, NPLOC4, KLF13, MAP2K2, TGFBR2, GAS6, HPCA, MZF1, CDC42BPA, CDC42BPB, ZFP385A, RNF187, MMP24, FBXL19, USP19, STAC2, SIK3, USP13, CAR14, ZSWIM6, ADNP, MMP17, ZSWIM7, VPS8, GNAL, TAF15, KSR1, PHYHD1, REPS2, FHL2, NECAB3, NECAB2, PLA2G12A, ILVBL, LIMD2, TCEA2, FEN1, GALNT14, BRD1, PPP1R10, TRIM25, SDHB, MNAT1, LRP1, CDH15, PDE2A, SDHC, MCFD2, NARFL, DGKZ, GNA12, MIPEP, ZFP787, ZFP580, PVALB, PDE4A, ZFP688, CTDSP2, RPS27A, HMGCL, PHRF1, ZFP692, ACTN4, MTA3, PDXP, STIM1, ACTN2, RNASEH2A, KDM2A, ZFP791, TESK1, ZFP511, |

|  |  |  |                                                                                                                                                                                                                                                                                                                                                                                                                                                                                                                                                                                                                                                                                                                                                                                                                                                                                                                                                                                                       |  |  |                                                                                                                                                                                                                                                                                                                                                                                                                                                                                                                                                                                                                                                                                                                                                                                                                                                                                                                                                                                                                                                                                                                                                      |
|--|--|--|-------------------------------------------------------------------------------------------------------------------------------------------------------------------------------------------------------------------------------------------------------------------------------------------------------------------------------------------------------------------------------------------------------------------------------------------------------------------------------------------------------------------------------------------------------------------------------------------------------------------------------------------------------------------------------------------------------------------------------------------------------------------------------------------------------------------------------------------------------------------------------------------------------------------------------------------------------------------------------------------------------|--|--|------------------------------------------------------------------------------------------------------------------------------------------------------------------------------------------------------------------------------------------------------------------------------------------------------------------------------------------------------------------------------------------------------------------------------------------------------------------------------------------------------------------------------------------------------------------------------------------------------------------------------------------------------------------------------------------------------------------------------------------------------------------------------------------------------------------------------------------------------------------------------------------------------------------------------------------------------------------------------------------------------------------------------------------------------------------------------------------------------------------------------------------------------|
|  |  |  | <p> P4HA3, NOS2,<br/> COL11A2, IHH,<br/> PRSS37, KCNMA1,<br/> ZFP422, ACO1,<br/> ZSWIM6, CYB5B,<br/> RBBP6, PJA2,<br/> RNF180, KSR2,<br/> ZFP866, ASH1L,<br/> GNAS, ZMYND11,<br/> NKD2, ZFP712, TH,<br/> FHL3, MYCBP2,<br/> DGKA, DGKB,<br/> MORC4, PPP2CA,<br/> ETFDH, PRKAA2,<br/> RBM26, LRSAM1,<br/> ZFP57, ATP1A3,<br/> ZFP119B, TRIM26,<br/> ATP1A1, TRIM24,<br/> SF3A2, CAPN2,<br/> PCK1, ZFP9, ZFP106,<br/> CYP4F18, SDHC,<br/> ZFP207, CHN1,<br/> NR5A1, CALM1,<br/> APOBEC3, GM5136,<br/> GNA11, LNX2,<br/> LMO7, COX5B,<br/> ZFP786, RNF141,<br/> CYP2J11, TIMM9,<br/> CTDSP2, ASPH,<br/> 2010111I01RIK,<br/> AMY1, ZFP692,<br/> KCND1, NUDT5,<br/> PDE4D, PDE4C,<br/> SUZ12, ZFP598,<br/> PDE5A, VSNL1,<br/> RNF138, COL1A1,<br/> CAR4, PPP5C, CAR7,<br/> ARFGAP1, CNBP,<br/> ASTN2, RIOK1,<br/> LIN28A, ITGAM,<br/> RBX1, VDR, PDE6C,<br/> ZFP760, RNF168,<br/> TRAF7, B4GALT6,<br/> RNF14, RNF13,<br/> TAF3, WHSC1,<br/> ITGA4, CACNA1S,<br/> GM14326, TRIM56,<br/> PHF3, GM14325, </p> |  |  | <p> ARFGAP1, ARFGAP2,<br/> TRAF2, CNBP, ME3,<br/> ELAC2, TIMP4, ZFP763,<br/> TIMP3, ECE2, RNF165,<br/> ADAM33, RNF169,<br/> RNF167, DDX41,<br/> B4GALT6, TRAF6, SDF4,<br/> B4GALT7, TRAF4,<br/> TRP53, B4GALT3,<br/> B4GALT2, TRIP4,<br/> EHMT1, AKAP8L,<br/> MYL12B, RFNG, VAV1,<br/> B3GAT3, EBF4, DOHH,<br/> POLD1, CARS2, HIVEP1,<br/> RPL37A, ABL2,<br/> CACNA1A, HDAC7,<br/> ZFP13, CYC1, ZKSCAN1,<br/> NDUFS7, TRIM8,<br/> HMOX1, ZCCHC9,<br/> ZFPL1, E4F1,<br/> CDK5RAP1, NDUFS2,<br/> KDM5B, ZCCHC2,<br/> ZFP553, TRPM7,<br/> IRF2BP2, TOPORS,<br/> ZFP652, PPM1F, ISCA2,<br/> PPM1K, ZFAND2B,<br/> CHFR, KDM6B, ACVR1,<br/> CYP2U1, PHLPP1,<br/> EGLN2, CABP5,<br/> TIMM13, CDH2, CDH5,<br/> DPF1, APLP1, CDH8,<br/> NUDT8, RNF128,<br/> NAIP5, GGPS1, ZFP524,<br/> ZFP523, EHD1, CHD4,<br/> VPS18, PDF, SLX1B,<br/> CYP20A1, ADI1, CADPS,<br/> RNF115, ZBED4,<br/> SMPD1, ZFP536,<br/> S100A3, S100A6, ALAD,<br/> ZFP637, QPCTL,<br/> ZFP335, SYT3, PRIM2,<br/> NT5C2, CYHR1, S100A1,<br/> YDJC, POLL, ZC3HC1,<br/> RPP21, ZFP467,<br/> NUDT11, PRDM8,<br/> UHRF2, PIAS4, SIAH1A,<br/> UBR5, DEAF1, MYO9B,<br/> CALR, ZFP457, RIMS1, </p> |
|--|--|--|-------------------------------------------------------------------------------------------------------------------------------------------------------------------------------------------------------------------------------------------------------------------------------------------------------------------------------------------------------------------------------------------------------------------------------------------------------------------------------------------------------------------------------------------------------------------------------------------------------------------------------------------------------------------------------------------------------------------------------------------------------------------------------------------------------------------------------------------------------------------------------------------------------------------------------------------------------------------------------------------------------|--|--|------------------------------------------------------------------------------------------------------------------------------------------------------------------------------------------------------------------------------------------------------------------------------------------------------------------------------------------------------------------------------------------------------------------------------------------------------------------------------------------------------------------------------------------------------------------------------------------------------------------------------------------------------------------------------------------------------------------------------------------------------------------------------------------------------------------------------------------------------------------------------------------------------------------------------------------------------------------------------------------------------------------------------------------------------------------------------------------------------------------------------------------------------|

|  |  |  |                                                                                                                                                                                                                                                                                                                                                                                                                                                                                                                                                                   |  |  |                                                                                                                                                                                                                                                                                                                                                                                                                                                                                                                                                                                                                                                                                                                                                                                                                                                                                                                        |
|--|--|--|-------------------------------------------------------------------------------------------------------------------------------------------------------------------------------------------------------------------------------------------------------------------------------------------------------------------------------------------------------------------------------------------------------------------------------------------------------------------------------------------------------------------------------------------------------------------|--|--|------------------------------------------------------------------------------------------------------------------------------------------------------------------------------------------------------------------------------------------------------------------------------------------------------------------------------------------------------------------------------------------------------------------------------------------------------------------------------------------------------------------------------------------------------------------------------------------------------------------------------------------------------------------------------------------------------------------------------------------------------------------------------------------------------------------------------------------------------------------------------------------------------------------------|
|  |  |  | <p>SALL4, ZFP146, S100B, ITGA6, GM14322, FREM2, ZIC4, PRICKLE2, CYP2C38, AGTPBP1, MOB3C, PINK1, ZKSCAN1, DPH3, UQCRFS1, RHOU, TNIP2, IMPDH1, IMPDH2, ARL1, HMGCLL1, CYCS, RING1, MBNL2, COQ7, XRCC6BP1, ARL3, LAP3, RFWD2, ACVR2A, PPM1D, RFWD3, ZFP658, MDM2, UGP2, PEG3, AOC3, ING3, ZFP397, GALNT7, ADAMTS16, GLIS1, TIPARP, CYTB, BRSK1, NR3C1, ZFP661, CDH4, DROSHA, ADAT1, NPTX1, RASGRP1, ZFP664, PIKFYVE, TGM3, PLCD4, SCO1, ZBTB7B, INSM1, CYP2C70, WDFY1, ZFP386, CYP21A1, GM14410, TAB2, TAB3, SIRT3, GM14418, APIP, ALKBH3, ALKBH2, ALKBH5, ARAP1</p> |  |  | <p>TCF20, GALNS, NR1H3, ZFP346, KLF6, ZBTB48, IKZF4, CRIP1, OSGEP, SCD2, S100A16, HPCAL1, GDE1, SMYD2, ZFP445, ZFP746, U2AF1L4, ZBTB43, PPA1, CBLB, RNF7, ATP13A1, ATP2A3, RNF5, KLF2, PLA2G4B, TSNAX, ZMAT2, ZEB2, TRMT1, EFHD2, CGREF1, MBTD1, ELOF1, NT5M, NR2F6, ALOX12B, NEURL1B, NOS3, NEURL1A, AGAP3, ZBTB22, ZFP423, ZBTB20, ZCCHC10, SF1, HERC2, GMPR, RBBP6, ADO, ZFP865, RAB11FIP3, ZFP866, DNAJC24, ZFP869, ZFP961, THAP7, ZFP64, THAP4, ZFP414, THAP3, USP5, CETN2, ZFP316, PFAS, CYB561D2, CYB561D1, MORC3, TYW1, DTNB, ZFP410, BAZ2A, RBM22, MEX3B, ATP1A2, ATMIN, SOD2, BLVRA, PAPOLA, FYN, CYP4F16, ARSA, CALM2, APOBEC3, SLC6A1, CLYBL, FAHD1, GATA5, SLC25A23, TRIM44, RNF38, RABGEF1, PPP4C, ITPK1, RNF31, PICK1, TRIM41, ISCU, CPE, CHPF, MORC2A, RNF26, KALRN, ZC3H3, AMZ2, ITGB2, LMAN2, ZFAND1, RIOK2, RBX1, MYL9, PRR3, RNF10, STK38L, EWSR1, ACY3, ZMYM3, GALT, MUL1, UBOX5, TET2, LHPP,</p> |
|--|--|--|-------------------------------------------------------------------------------------------------------------------------------------------------------------------------------------------------------------------------------------------------------------------------------------------------------------------------------------------------------------------------------------------------------------------------------------------------------------------------------------------------------------------------------------------------------------------|--|--|------------------------------------------------------------------------------------------------------------------------------------------------------------------------------------------------------------------------------------------------------------------------------------------------------------------------------------------------------------------------------------------------------------------------------------------------------------------------------------------------------------------------------------------------------------------------------------------------------------------------------------------------------------------------------------------------------------------------------------------------------------------------------------------------------------------------------------------------------------------------------------------------------------------------|

|                    |     |   |          |                                                                                                                                                                                                                                                                                                                                                                                    |     |   |                                                                                                                                                                                                                                                                                                                                                                                                                 |                                                                                                                                                                                                                                                                                                                                                                                                       |
|--------------------|-----|---|----------|------------------------------------------------------------------------------------------------------------------------------------------------------------------------------------------------------------------------------------------------------------------------------------------------------------------------------------------------------------------------------------|-----|---|-----------------------------------------------------------------------------------------------------------------------------------------------------------------------------------------------------------------------------------------------------------------------------------------------------------------------------------------------------------------------------------------------------------------|-------------------------------------------------------------------------------------------------------------------------------------------------------------------------------------------------------------------------------------------------------------------------------------------------------------------------------------------------------------------------------------------------------|
|                    |     |   |          |                                                                                                                                                                                                                                                                                                                                                                                    |     |   | GM14326, GCM1, PRICKLE1, DNMT1, ASNA1, PHF8, GPATCH8, EPS15L1, CBFA2T3, PSPH, PDCD2, GSS, DGCR8, MT3, EGR1, SUOX, ELP3, WBSCR17, NRXN3, PFKP, ADIPOR2, ZFP322A, PRKCE, GZF1, NUCB1, MYT1L, DDR1, EYA1, DIS3L2, AOC2, ZFP367, FTL1, ZC4H2, NANOS1, GLRX2, RASGRP2, PLCD3, MUS81, SCNM1, PLCD1, ZFP292, CAMK2A, ENO1, DUS3L, DTX4, ZBTB7A, DTX1, SIRT4, SIRT7, PARK2, SPARC, HBA-A1, TDP2, ZC3H11A, ATP8A1, RNF41 |                                                                                                                                                                                                                                                                                                                                                                                                       |
| <b>Zinc-finger</b> | 123 | 8 | 1.92E-04 | PNMA3, DZIP1, LNX2, ZNRF4, RP9, RORB, ZFP786, BTK, RNF141, ZFP930, U2AF1, ZRSR1, ZFP936, ZFP692, PLD6, RXRG, SUZ12, PRDM9, ZFP598, HNF4A, ZGLP1, RNF138, UNC13B, ARFGAP1, FUS, CNBP, ZCRB1, AKAP13, LIN28A, RBX1, PLAGL1, VDR, ZFP760, RNF168, TRAF7, RNF14, RNF13, AEBP2, TAF3, WHSC1, ZFP609, ZFP940, GM14326, CBLC, TRIM56, PHF3, GM14325, ZFP442, SALL4, RNF7, ZFP146, RAPSIN, | 187 | 9 | 1.07E-05                                                                                                                                                                                                                                                                                                                                                                                                        | ZFP637, ZFP335, ZFP787, ZFP580, BRPF1, GATA5, TRIM44, RABGEF1, ZFP688, RNF38, CYHR1, RPS27A, RNF31, ZFP692, PHRF1, ZC3HC1, MTA3, TRIM41, ZFP467, PRDM8, UHRF2, PIAS4, KDM2A, UBR5, SIAH1A, ZFP791, MORC2A, ZNHIT1, RNF26, ZFP511, ZNHIT3, ZC3H3, ARFGAP1, DEAF1, TRAF2, ARFGAP2, CNBP, MYO9B, ZFP763, ZFAND1, RIMS1, ZFP457, RBX1, TMEM129, TCF20, RPS27, PRR3, RNF165, RNF169, RNF10, RNF167, TRAF6, |

|  |  |  |  |                                                                                                                                                                                                                                                                                                                                                                                                                                                                                                                                                     |  |  |  |                                                                                                                                                                                                                                                                                                                                                                                                                                                                                                                                                                                                                                                                                                                                                                                                                                                                                                                          |
|--|--|--|--|-----------------------------------------------------------------------------------------------------------------------------------------------------------------------------------------------------------------------------------------------------------------------------------------------------------------------------------------------------------------------------------------------------------------------------------------------------------------------------------------------------------------------------------------------------|--|--|--|--------------------------------------------------------------------------------------------------------------------------------------------------------------------------------------------------------------------------------------------------------------------------------------------------------------------------------------------------------------------------------------------------------------------------------------------------------------------------------------------------------------------------------------------------------------------------------------------------------------------------------------------------------------------------------------------------------------------------------------------------------------------------------------------------------------------------------------------------------------------------------------------------------------------------|
|  |  |  |  | <p>GM14322, ZIC4, DZIP1L, ZFP947, ZFP949, TRAFD1, PRKRIR, ZMAT1, SH3RF1, PPARA, ZFP46, PPARG, ZKSCAN1, DPH3, GLI3, STAC3, GM14391, GM14393, TNIP2, ZFP422, ZSWIM6, RING1, MBNL2, RBBP6, RNF180, PJA2, RFWD2, KSR2, RFWD3, ZFP658, ZFP866, ASH1L, MDM2, PEG3, ZMYND11, ING3, ZFP397, TIPARP, ZFP712, GLIS1, FHL3, ZFP661, NR3C1, MYCBP2, DGKA, DGKB, MORC4, RASGRP1, PIKFYVE, ZFP664, RBM26, ZBTB7B, INSM1, LRSAM1, WDFY1, ZFP57, ZFP386, ZFP119B, GM14410, TRIM26, TRIM24, SF3A2, TAB2, TAB3, GM14418, ZFP9, ZFP106, CHN1, ZFP207, ARAP1, NR5A1</p> |  |  |  | <p>DDX41, TRAF4, EWSR1, NR1H3, ZFP346, IKZF4, ZC3H13, ZBTB48, KLF6, NPLOC4, TRIP4, KLF13, ZMYM3, AKAP8L, MUL1, SMYD2, UBOX5, ZFP445, VAV1, U2AF1L4, ZFP746, ZBTB43, GM14326, CBLB, RNF7, EBF4, RNF5, POLD1, MZF1, CDC42BPA, DNMT1, HIVEP1, RPL37A, KLF2, PHF8, GPATCH8, CDC42BPB, ZFP385A, ZFP13, ZMAT2, RNF187, TRMT1, ZKSCAN1, ZEB2, CBFA2T3, PDCD2, FBXL19, USP19, STAC2, MBTD1, TRIM8, ELOF1, NR2F6, ZCCHC9, ZFPL1, NEURL1B, E4F1, NEURL1A, KDM5B, AGAP3, USP13, ZBTB22, EGR1, ZFP423, ZCCHC10, ZBTB20, ZCCHC2, ZFP553, ZSWIM6, SF1, ADNP, ZSWIM7, IRF2BP2, ZFP322A, TOPORS, HERC2, PRKCE, RBBP6, GZF1, VPS8, ZFP652, MYT1L, ZFP865, ZFP866, TAF15, DNAJC24, ZFAND2B, ZFP869, KSR1, ZFP961, CHFR, ZFP367, THAP7, ZFP64, THAP4, THAP3, ZC4H2, ZFP414, USP5, NANOS1, FHL2, ZFP316, DPF1, MORC3, RASGRP2, RNF128, DTNB, ZFP410, ZFP524, ZFP523, SCN1, ZFP292, TCEA2, BAZ2A, CHD4, DUS3L, RBM22, DTX4, ZBTB7A, BRD1,</p> |
|--|--|--|--|-----------------------------------------------------------------------------------------------------------------------------------------------------------------------------------------------------------------------------------------------------------------------------------------------------------------------------------------------------------------------------------------------------------------------------------------------------------------------------------------------------------------------------------------------------|--|--|--|--------------------------------------------------------------------------------------------------------------------------------------------------------------------------------------------------------------------------------------------------------------------------------------------------------------------------------------------------------------------------------------------------------------------------------------------------------------------------------------------------------------------------------------------------------------------------------------------------------------------------------------------------------------------------------------------------------------------------------------------------------------------------------------------------------------------------------------------------------------------------------------------------------------------------|

|      |     |    |          |                                                                                                                                                                                                                                                                                                                                                                                                                                                                                                                                                                                                                                           |     |    |          |                                                                                                                                                                                                                                                                                                                                                                                                                                                                                                                                                                                                                                                                                                                                                                                 |
|------|-----|----|----------|-------------------------------------------------------------------------------------------------------------------------------------------------------------------------------------------------------------------------------------------------------------------------------------------------------------------------------------------------------------------------------------------------------------------------------------------------------------------------------------------------------------------------------------------------------------------------------------------------------------------------------------------|-----|----|----------|---------------------------------------------------------------------------------------------------------------------------------------------------------------------------------------------------------------------------------------------------------------------------------------------------------------------------------------------------------------------------------------------------------------------------------------------------------------------------------------------------------------------------------------------------------------------------------------------------------------------------------------------------------------------------------------------------------------------------------------------------------------------------------|
|      |     |    |          |                                                                                                                                                                                                                                                                                                                                                                                                                                                                                                                                                                                                                                           |     |    |          | VPS18, DTX1, SLX1B, MEX3B, PPP1R10, TRIM25, PARK2, ATMIN, MNAT1, RNF115, ZBED4, DGKZ, ZC3H11A, ZFP536, RNF41                                                                                                                                                                                                                                                                                                                                                                                                                                                                                                                                                                                                                                                                    |
| Zinc | 153 | 10 | 8.77E-04 | APOBEC3, PNMA3, GM5136, DZIP1, LNX2, LMO7, ZNRF4, RP9, RORB, COX5B, ZFP786, BTK, RNF141, ZFP930, TIMM9, U2AF1, ZRSR1, 2010111I01RIK, ZFP936, ZFP692, CLCA1, KCND1, PLD6, RXRG, SUZ12, PRDM9, ZFP598, HNF4A, PDE5A, ZGLP1, RNF138, ADAMTS1, CAR4, UNC13B, CAR7, FUS, ARFGAP1, ERMP1, CNBP, AKAP13, ZCRB1, UBA5, LIN28A, RBX1, PLAGL1, VDR, ZFP760, ZMPSTE24, RNF168, TRAF7, RNF14, RNF13, AEBP2, BMP1, TAF3, AGBL4, WHSC1, AFG3L1, ZFP609, ZFP940, GM14326, CBLC, TRIM56, PHF3, GM14325, ZFP442, RNF7, SALL4, ZFP146, S100B, RAPSN, GM14322, ZIC4, DZIP1L, PRICKLE2, ZFP947, ZFP949, TRAFD1, PRKRIR, ZMAT1, SH3RF1, PPARA, ZFP46, AGTPBP1, | 237 | 12 | 3.55E-05 | S100A3, ALAD, GDA, ZFP637, QPCTL, ZFP335, BRPF1, DDAH1, CYHR1, S100A1, ZC3HC1, RPP21, CRYAB, ZFP467, PRDM8, UHRF2, PIAS4, UBR5, SIAH1A, ZNHIT1, ZNHIT3, DEAF1, MYO9B, CALR, ZFP457, RIMS1, TMEM129, TCF20, RPS27, CDADC1, NR1H3, ZFP346, IKZF4, ZC3H13, KLF6, ZBTB48, NPLOC4, CRIP1, KLF13, SMYD2, ZFP445, U2AF1L4, ZFP746, ZBTB43, CBLB, RNF7, RNF5, MZF1, CDC42BPA, KLF2, CDC42BPB, ZFP385A, ZMAT2, RNF187, ZEB2, TRMT1, MMP24, FBXL19, USP19, STAC2, MBTD1, ELOF1, NR2F6, NOS3, NEURL1B, NEURL1A, AGAP3, USP13, ZBTB22, ZFP423, ZCCHC10, ZBTB20, CAR14, SF1, ZSWIM6, ADNP, MMP17, ZSWIM7, HERC2, RBBP6, VPS8, ZFP865, ZFP866, TAF15, DNAJC24, ZFP869, KSR1, ZFP961, THAP7, ZFP64, THAP4, THAP3, ZFP414, USP5, FHL2, ZFP316, MORC3, DTNB, ZFP410, LIMD2, TCEA2, BAZ2A, RBM22, |



|  |  |  |  |                                                                                                                                                                                                                                                                                                                                                                                                                                                                                                                                                                                                                                                                                                             |  |  |  |                                                                                                                                                                                                                                                                                                                                                                                                                                                                                                                                                                                                                                                                                                                                                                                                                                                                                                                                                                                                                                                                                                                        |
|--|--|--|--|-------------------------------------------------------------------------------------------------------------------------------------------------------------------------------------------------------------------------------------------------------------------------------------------------------------------------------------------------------------------------------------------------------------------------------------------------------------------------------------------------------------------------------------------------------------------------------------------------------------------------------------------------------------------------------------------------------------|--|--|--|------------------------------------------------------------------------------------------------------------------------------------------------------------------------------------------------------------------------------------------------------------------------------------------------------------------------------------------------------------------------------------------------------------------------------------------------------------------------------------------------------------------------------------------------------------------------------------------------------------------------------------------------------------------------------------------------------------------------------------------------------------------------------------------------------------------------------------------------------------------------------------------------------------------------------------------------------------------------------------------------------------------------------------------------------------------------------------------------------------------------|
|  |  |  |  | <p> <b>MOB3C, PPARG,<br/> ZKSCAN1, DPH3,<br/> GLI3, STAC3,<br/> GM14391,<br/> GM14393, NOS2,<br/> TNIP2, IHH, ZFP422,<br/> ZSWIM6, RING1,<br/> MBNL2, RBBP6,<br/> LAP3, RFWD2,<br/> RNF180, PJA2,<br/> KSR2, RFWD3,<br/> ZFP866, ZFP658,<br/> ASH1L, MDM2,<br/> PEG3, ZMYND11,<br/> ING3, ZFP397,<br/> ADAMTS16, GLIS1,<br/> ZFP712, TIPARP,<br/> FHL3, ZFP661,<br/> NR3C1, MYCBP2,<br/> DROSHA, DGKA,<br/> ADAT1, DGKB,<br/> MORC4, RASGRP1,<br/> PIKFYVE, ZFP664,<br/> RBM26, ZBTB7B,<br/> INSM1, LRSAM1,<br/> WDFY1, ZFP57,<br/> ZFP386, ZFP119B,<br/> TRIM26, GM14410,<br/> TRIM24, SF3A2,<br/> TAB2, TAB3, SIRT3,<br/> GM14418, ZFP9,<br/> ZFP106, CHN1,<br/> ZFP207, APIP,<br/> ARAP1, NR5A1</b> </p> |  |  |  | <p> <b>BRD1, MEX3B,<br/> PPP1R10, TRIM25,<br/> ATMIN, BLVRA,<br/> MNAT1, DGKZ,<br/> APOBEC3, MIPEP,<br/> ZFP787, ZFP580,<br/> GATA5, TRIM44,<br/> RABGEF1, ZFP688,<br/> RNF38, RPS27A,<br/> RNF31, ZFP692, PHRF1,<br/> PICK1, MTA3, TRIM41,<br/> CPE, KDM2A, ZFP791,<br/> MORC2A, RNF26,<br/> ZFP511, ZC3H3,<br/> ARFGAP1, TRAF2,<br/> ARFGAP2, CNBP,<br/> ELAC2, AMZ2, TIMP4,<br/> ZFP763, TIMP3,<br/> ZFAND1, RBX1, ECE2,<br/> PRR3, SLC30A1,<br/> RNF165, RNF169,<br/> ADAM33, RNF10,<br/> SLC30A3, RNF167,<br/> TRAF6, DDX41, TRAF4,<br/> EWSR1, TRP53,<br/> EHMT1, TRIP4, ACY3,<br/> ZMYM3, AKAP8L,<br/> GALT, MUL1, UBOX5,<br/> TET2, VAV1, GM14326,<br/> GCM1, EBF4, PRICKLE1,<br/> POLD1, DNMT1,<br/> CARS2, HIVEP1,<br/> RPL37A, ASNA1, PHF8,<br/> GPATCH8, HDAC7,<br/> ZFP13, ZKSCAN1,<br/> CBFA2T3, PDCD2,<br/> TRIM8, ZFPL1, ZCCHC9,<br/> E4F1, GPC1, KDM5B,<br/> MT3, EGR1, ZCCHC2,<br/> ZFP553, TRPM7,<br/> ADIPOR2, IRF2BP2,<br/> ZFP322A, TOPORS,<br/> PRKCE, GZF1, ZFP652,<br/> MYT1L, ZFAND2B,<br/> CHFR, KDM6B, ZFP367,<br/> ZC4H2, NANOS1,<br/> TIMM13, APLP1, DPF1,<br/> RASGRP2, NAIP5,</b> </p> |
|--|--|--|--|-------------------------------------------------------------------------------------------------------------------------------------------------------------------------------------------------------------------------------------------------------------------------------------------------------------------------------------------------------------------------------------------------------------------------------------------------------------------------------------------------------------------------------------------------------------------------------------------------------------------------------------------------------------------------------------------------------------|--|--|--|------------------------------------------------------------------------------------------------------------------------------------------------------------------------------------------------------------------------------------------------------------------------------------------------------------------------------------------------------------------------------------------------------------------------------------------------------------------------------------------------------------------------------------------------------------------------------------------------------------------------------------------------------------------------------------------------------------------------------------------------------------------------------------------------------------------------------------------------------------------------------------------------------------------------------------------------------------------------------------------------------------------------------------------------------------------------------------------------------------------------|

|  |  |  |  |  |  |  |  |                                                                                                                                                                                 |
|--|--|--|--|--|--|--|--|---------------------------------------------------------------------------------------------------------------------------------------------------------------------------------|
|  |  |  |  |  |  |  |  | RNF128, ZFP524,<br>ZFP523, SCNM1,<br>ZFP292, CHD4, DUS3L,<br>DTX4, ZBTB7A, VPS18,<br>DTX1, SLX1B, SIRT4,<br>SIRT7, PARK2, RNF115,<br>ZBED4, SMPD1,<br>ZC3H11A, ZFP536,<br>RNF41 |
|--|--|--|--|--|--|--|--|---------------------------------------------------------------------------------------------------------------------------------------------------------------------------------|

<sup>1</sup>Huang, D. W.; Sherman, B. T.; Lempicki, R. A. Systematic and integrative analysis of large gene lists using DAVID Bioinformatics Resources. *Nature Protoc.* **2009**, *4*, 44-57.
